# Supplementary material for: Minicell‐based fungal RNAi delivery for sustainable crop protection
Source: PubMed Central journal article supplement — Microb Biotechnol. 2021 Feb 24;14(4):1847–56. doi: 10.1111/1751-7915.13699 (PMC8313293; doi:10.1111/1751-7915.13699), 2021-02-24
Supplement: MBT2-14-1847-s001.pdf [file MBT2-14-1847-s001.pdf]

# **Minicell-based fungal RNAi delivery for sustainable crop protection**

Md Tabibul Islam<sup>1</sup>, Zachery Davis<sup>2</sup>, Lisa Chen<sup>2</sup>, Jacob Englaender<sup>2</sup>, Sepehr Zomorodi<sup>2</sup>, Joseph Frank<sup>2</sup>, Kira Bartlett<sup>2</sup>, Elisabeth Somers<sup>2</sup>, Sergio M. Carballo<sup>2</sup>, Mark Kester<sup>2,3</sup>, Ameer Shakeel<sup>2</sup>, Payam Pourtaheri<sup>2\*</sup>✉, Sherif M Sherif<sup>1\*</sup>✉

<sup>1</sup>Alson H. Smith Jr. Agricultural Research and Extension Center, School of Plant and Environmental Sciences, Virginia Tech, Winchester, VA 22602, USA. <sup>2</sup>AgroSpheres, INC. 1180 Seminole Trail, STE 100, Charlottesville, VA 22901, USA. <sup>3</sup>Department of Pharmacology, University of Virginia, Charlottesville, VA 22908, USA.

\*✉e-mail: [payam@agrospheres.com](mailto:payam@agrospheres.com); [ssherif@vt.edu](mailto:ssherif@vt.edu).

**Table S1.** RNA production data from four different bioreactors

|                     | <b>Analysis<br/>Average (ng)</b> | <b>Volume<br/>Analyzed (μL)</b> | <b>Total Volume<br/>(mL)</b> | <b>RNA Yield<br/>(ng/mL)</b> | <b>Total RNA Yield<br/>(mg)</b> |
|---------------------|----------------------------------|---------------------------------|------------------------------|------------------------------|---------------------------------|
| <b>Bioreactor 1</b> | 3342.92                          | 41                              | 1310                         | 81534.63                     | 106.81                          |
| <b>Bioreactor 2</b> | 5424.15                          | 38                              | 1317                         | 142740.82                    | 187.99                          |
| <b>Bioreactor 3</b> | 6119.88                          | 44                              | 1329                         | 139088.21                    | 184.85                          |
| <b>Bioreactor 4</b> | 4552.50                          | 42                              | 1319                         | 108392.92                    | 142.97                          |

**Table S2.** Specific primers used for qRT-PCR analysis

| <b>Target<br/>gene</b> | <b>Gene Bank<br/>Number</b> | <b>Forward sequence</b>   | <b>Reverse sequence</b>   |
|------------------------|-----------------------------|---------------------------|---------------------------|
| <i>Chs3a</i>           | AF494188.1                  | 5'-ACTGCTACCCCATCATCA-3'  | 5'-GGATCCCTTAGGCCGATTA-3' |
| <i>Chs3b</i>           | AF529208.1                  | 5'-AAGGCCCTGCTGAGTTTCT-3' | 5'-ACATGCGACCGAAGTGAAT-3' |
| <i>DCL1</i>            | XM_024696562.1              | 5'-TTCAAACGGCAATCAAGGT-3' | 5'-CCTTAAAGGAGGCCCAAAG-3' |
| <i>DCL2</i>            | XM_024697207.1              | 5'-CTTCGCGTTTGAATGATCC-3' | 5'-CAGACGTTCCCATGCTCTC-3' |
| <i>β-actin</i>         | AJ000335.1                  | 5'-GATTCCGGTGACGGAGTTA-3' | 5'-AAATCACGACCAGCCATGT-3' |
| <i>Tubulin</i>         | XM_001555875.2              | 5'-CTACCCAGCACCAAAACC-3'  | 5'-ACAGTCGGAGTGCTCAAGG-3' |

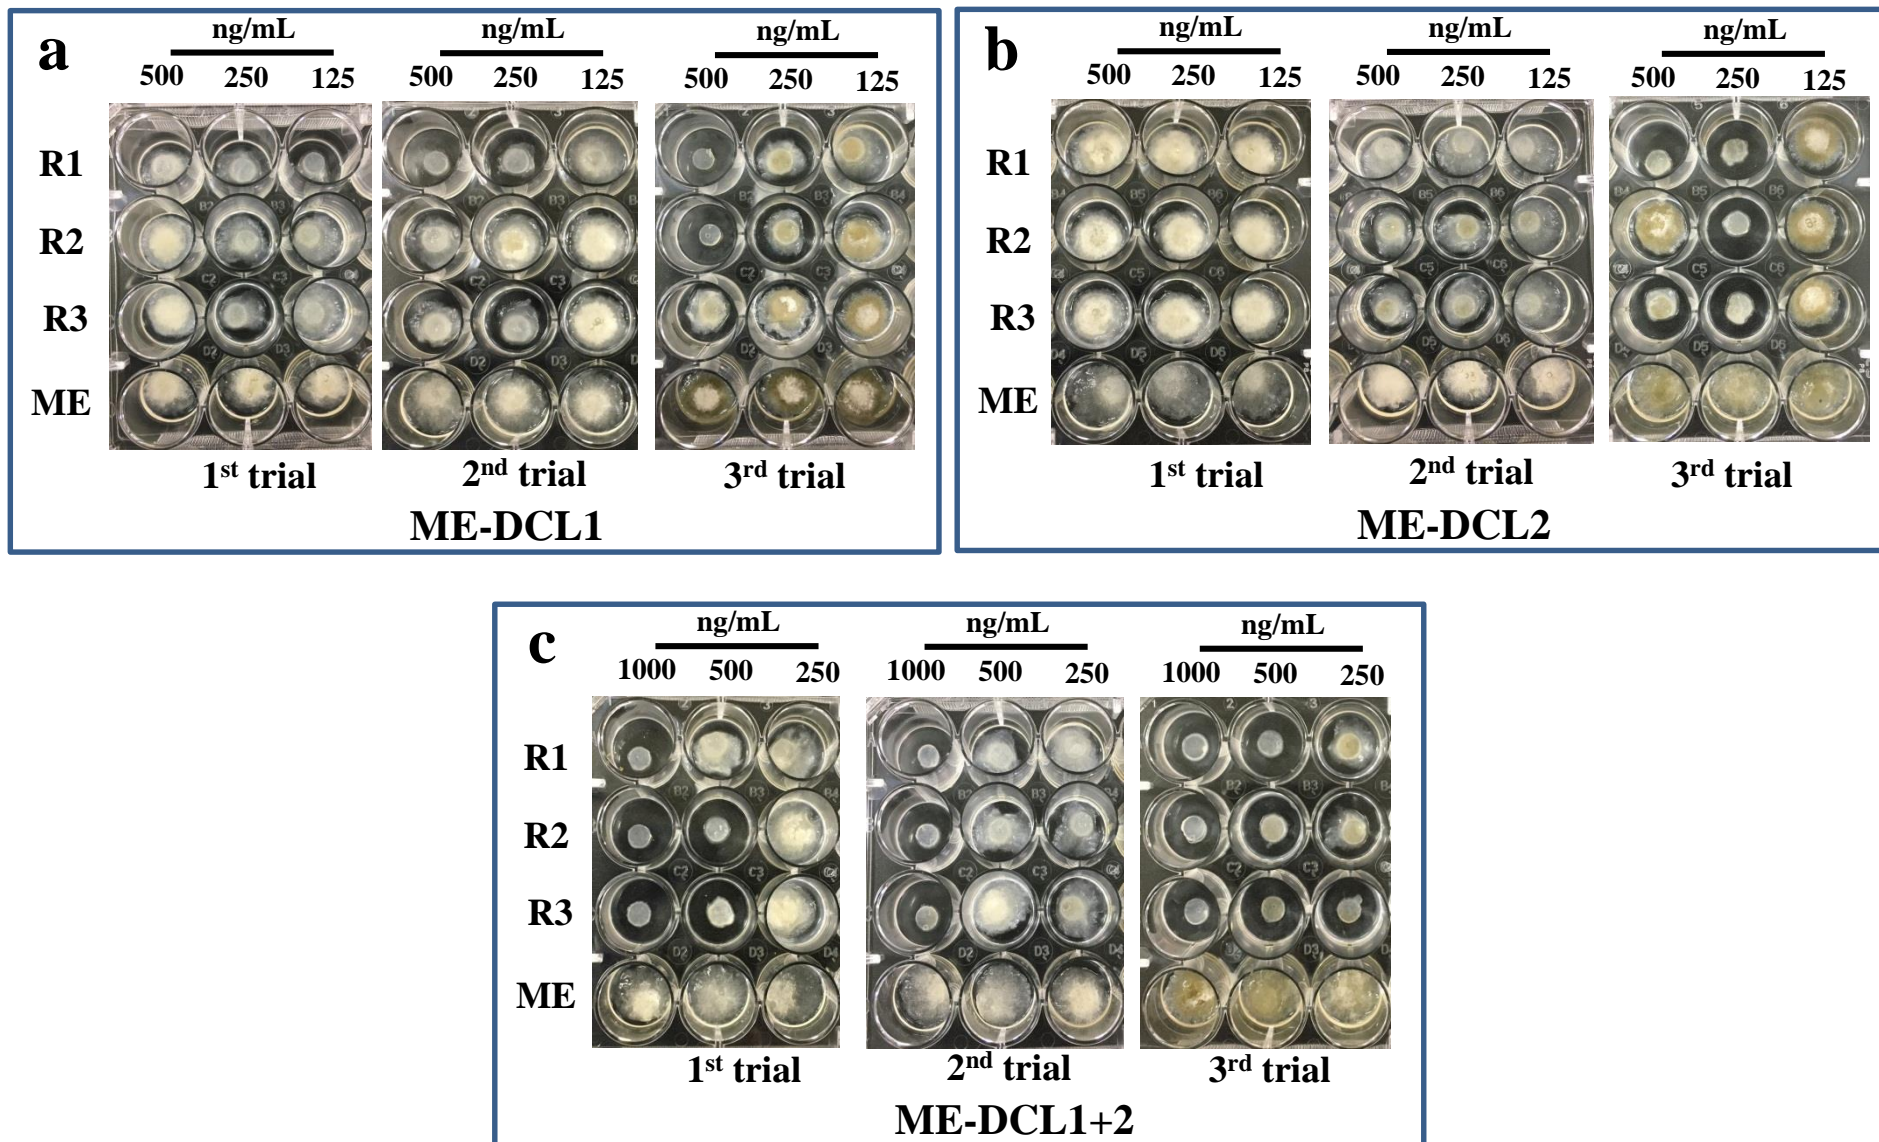

**Fig. S1.** The *Botryotinia fuckeliana* mycelial growth inhibitory activity of the minicells-encapsulated dsRNAs targeting *DCL1* and *DCL2* genes of *B. fuckeliana* at 72 hours after treatment. (a) ME-DCL1, (b) ME-DCL2, and (c) ME-DCL1+2. R: Biological replication; ME: empty-Minicells.

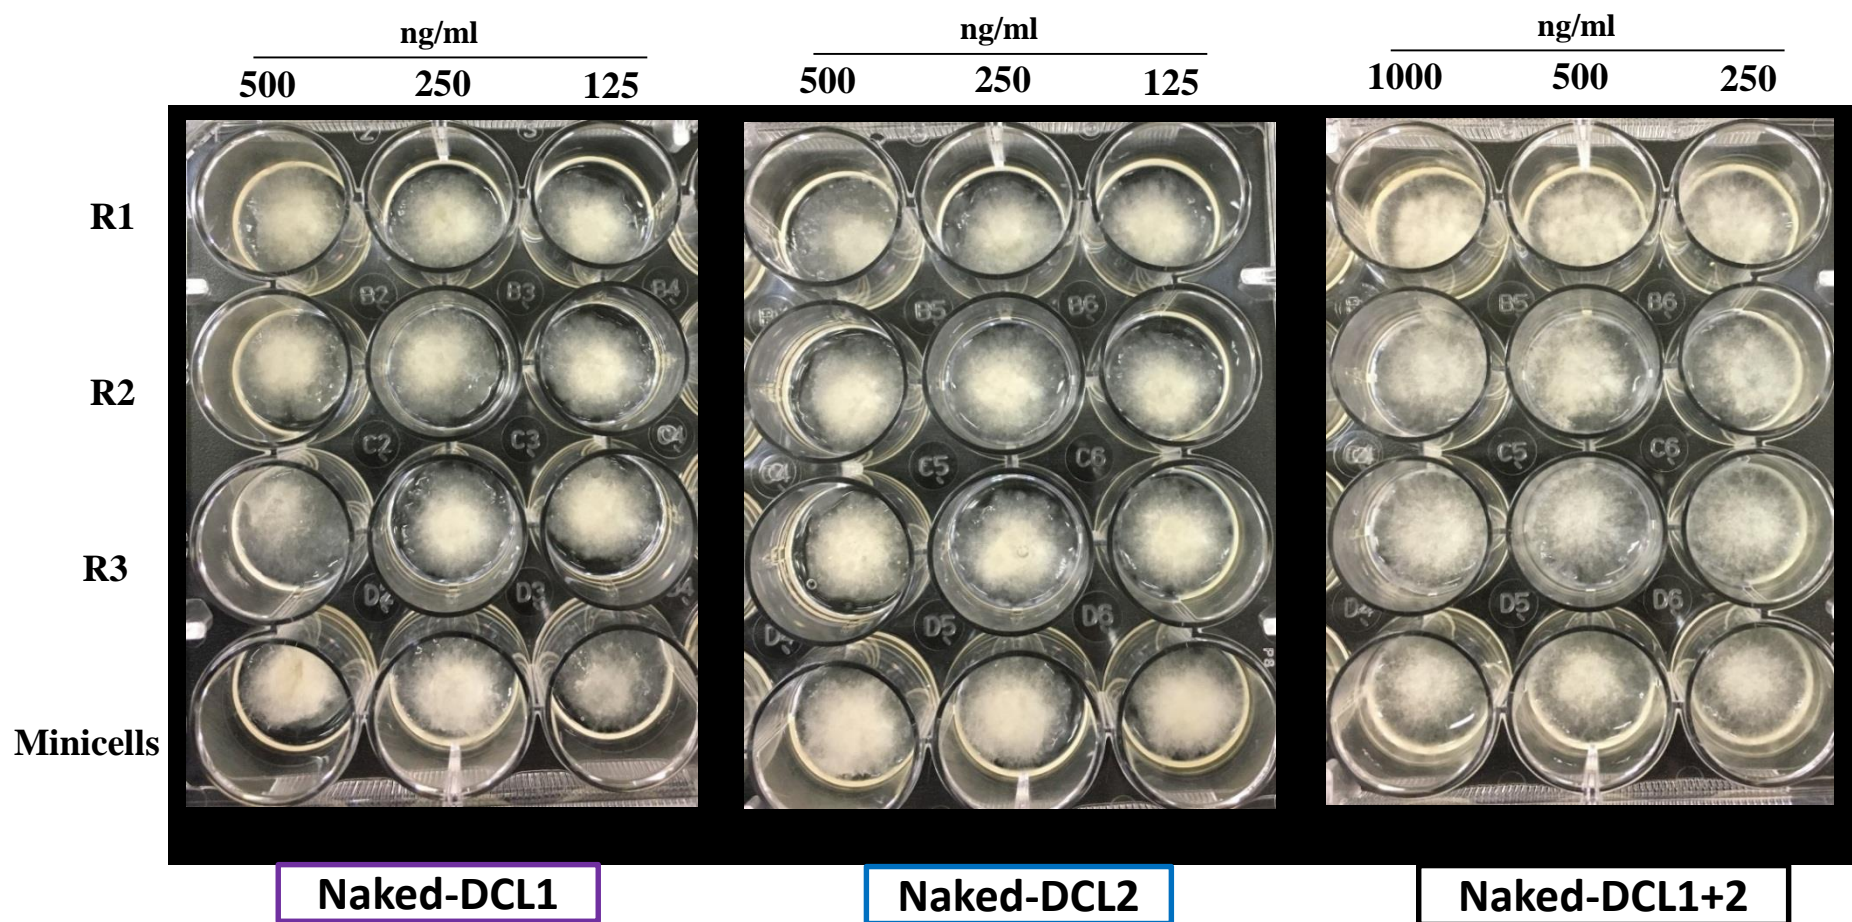

**Fig. S2.** The *Botryotinia fuckeliana* mycelial growth inhibitory activity of the minicells-encapsulated dsRNAs (ME-dsRNAs; ME-DCL1 and ME-DCL2) targeting both *DCL1* and *DCL2* genes of *B. fuckeliana* at 72 hours after treatment. R: Biological replication.

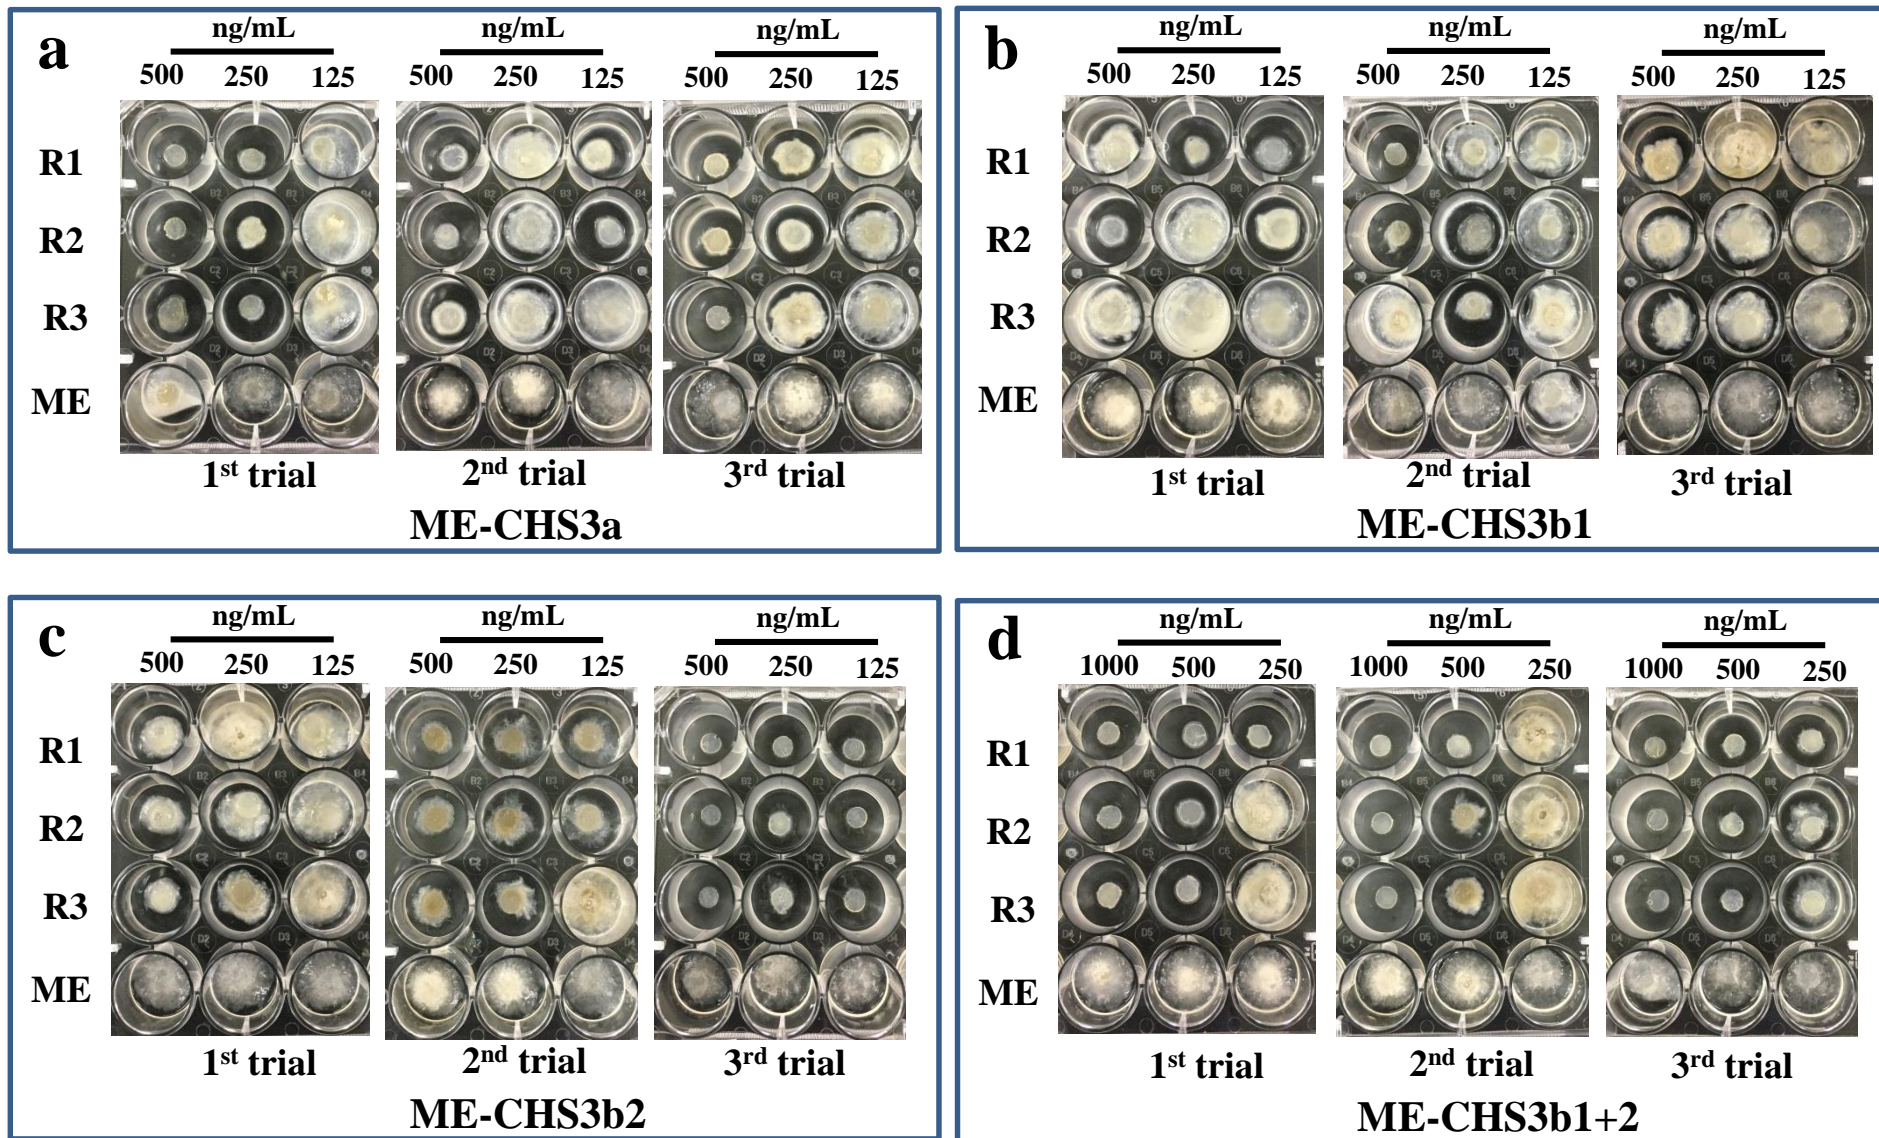

**Fig. S3.** The *Botryotinia fuckeliana* mycelial growth inhibitory activity of the minicells-encapsulated dsRNAs targeting *Chs3a* and *Chs3b* genes of *B. fuckeliana* at 72 hours after treatment. (a) ME-CHS3a, (b) ME-CHS3b1, (c) ME-CHS3b2, and (d) ME-CHS3b1+2. R: Biological replication; ME: empty-Minicells.

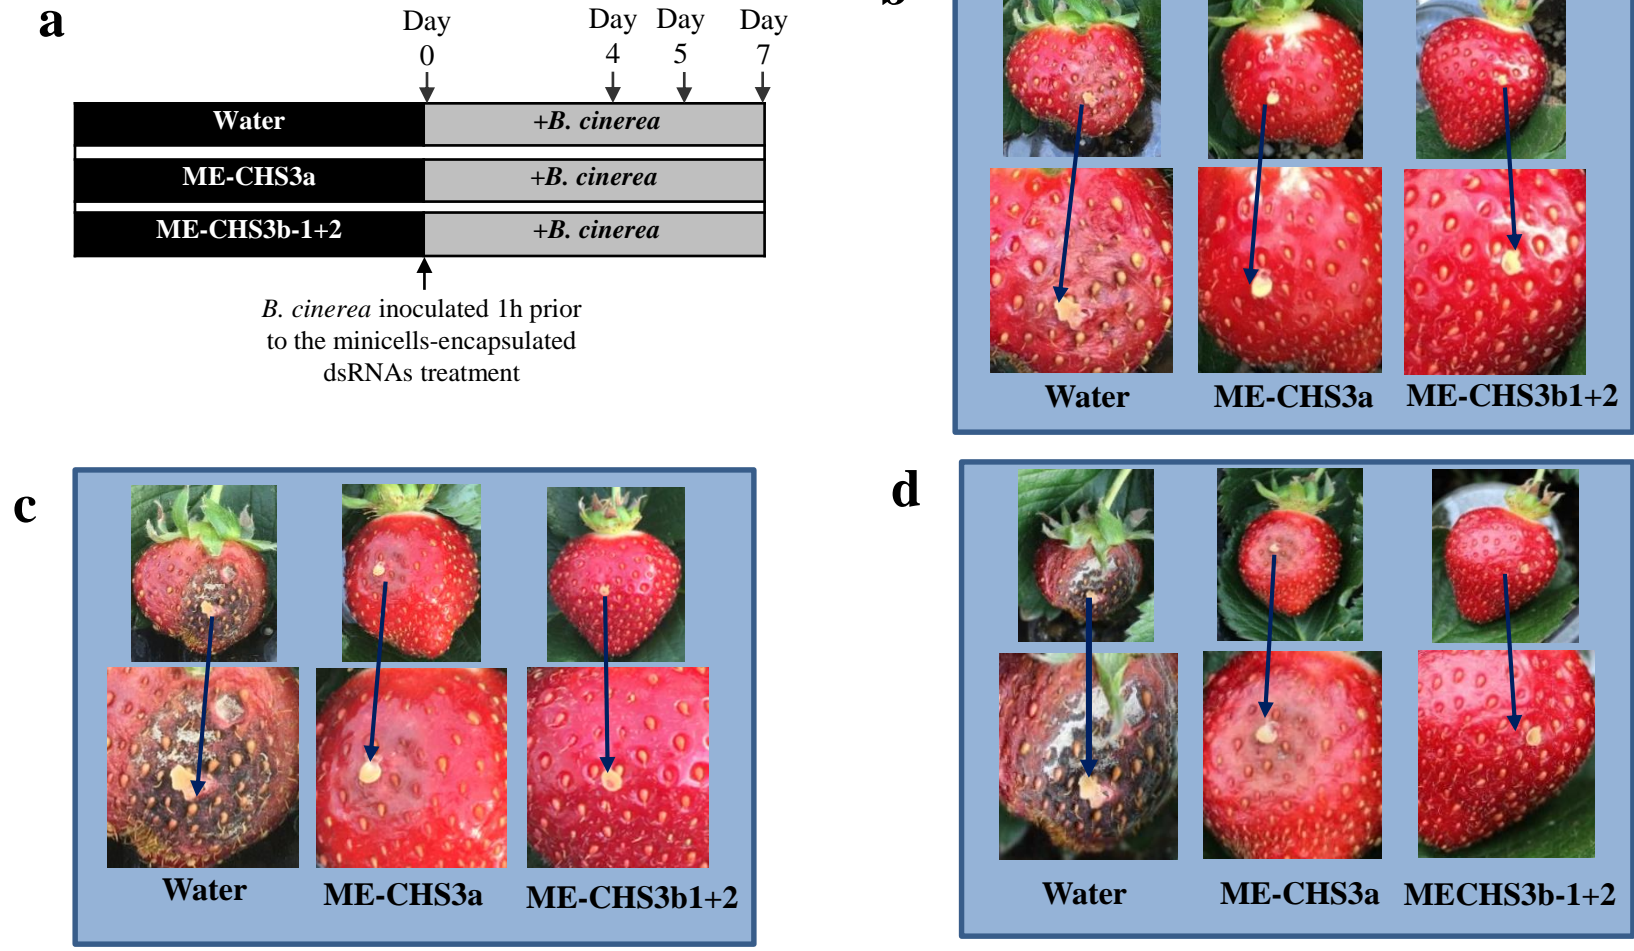

**Fig. S4.** Topically applied minicells-encapsulated dsRNAs (ME-dsRNAs; ME-CHS3a) targeting chitin synthase 3a (*Chs3a*) and combination of two ME-dsRNAs (ME-CHS2b1+ME-CHS3b2) targeting chitin synthase 3b (*Chs3b*) of *Botryotinia fuckeliana* on the strawberry fruits inhibited the gray mold disease progression. (a) Schematic representation of the ME-dsRNAs on strawberry fruit 1 hour prior to inoculation. The gray mold diseases symptom development at (b) 4 days post inoculation (dpi), (c) 5dpi, and (d) 7dpi. In order to determine the gray mold disease symptom development following ME-dsRNAs treatment. ME-CHS3a applied at dose of 500 ng/mL and the combination of ME-CHS3b-1 and 2 used at 1000 ng/ml (500  $\mu$ l/fruit).

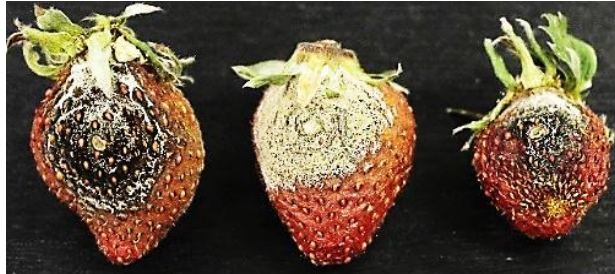

**Minicells**

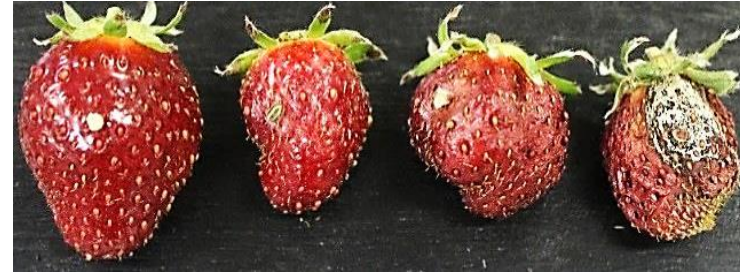

**ME-CHS3a**

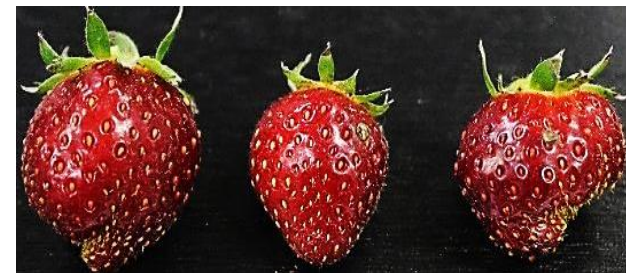

**ME-CHS3b-1+2**

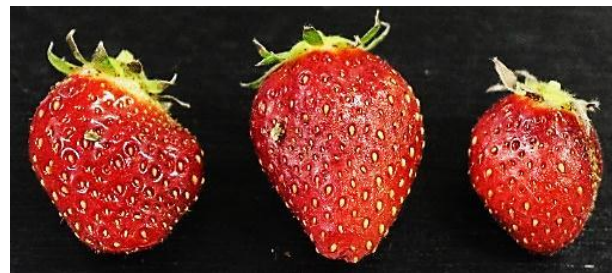

**ME-DCL1+2**

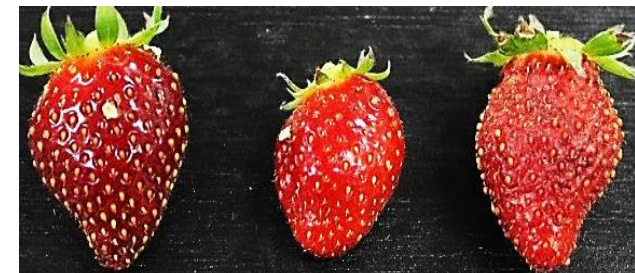

**Naked-CHS3b-1+2**

**Fig. S5.** Gray mold diseases symptom development on minicells-encapsulated dsRNAs (ME-dsRNAs) or naked-dsRNA targeting *Botryotinia fuckeliana* genes sprayed fruits when challenged with the *B. fuckeliana* 1h post treatment (1<sup>st</sup> trial). In first trail we used the minicells, ME-CHS3a (targeting *Chs3a*), ME-CHS3b1+2 (targeting *Chs3b*), ME-DCL1+2 (targeting *DCL1* and *DCL2*), and naked-CHS3b1+2 (*Chs3b*).

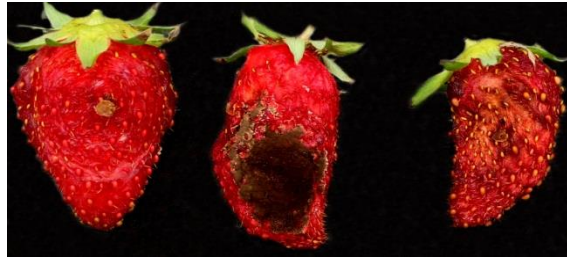

**Minicells**

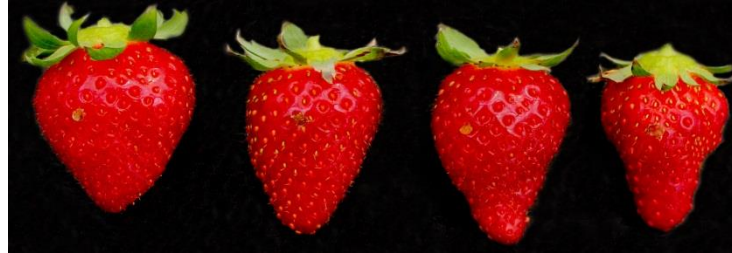

**ME-DCL1+2**

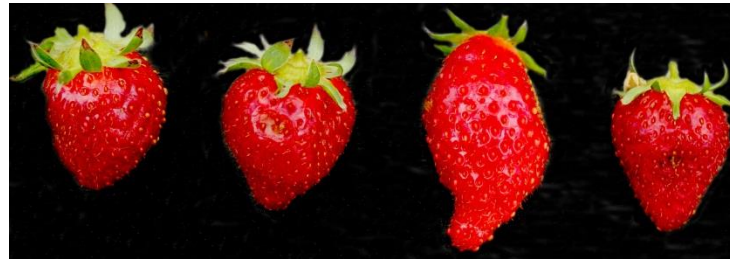

**Naked-DCL1+2**

**Fig. S6.** Gray mold diseases symptom development on minicells-encapsulated dsRNAs (ME-dsRNAs) or naked-dsRNA targeting *Botryotinia fuckeliana* genes sprayed fruits when challenged with the *B. fuckeliana* 1h post treatment (2<sup>nd</sup> trial). In 2<sup>nd</sup> trail we used the minicells, minicells-encapsulated dsRNAs (ME-DCL1+2) and naked-DCL1+2 (targeting *DCL1* and *DCL2*) treatments.



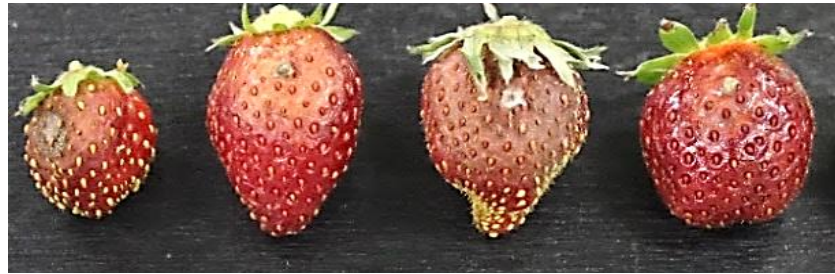

**Minicells**

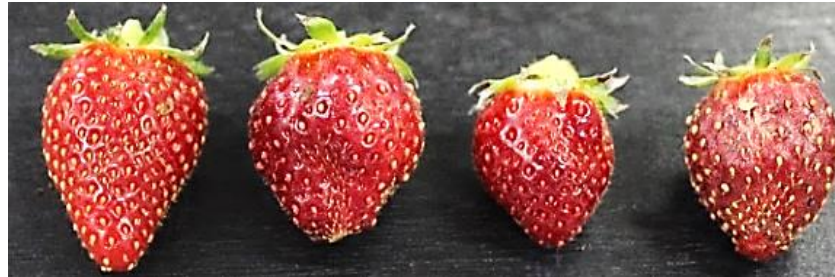

**ME-CHS3b-1+2**

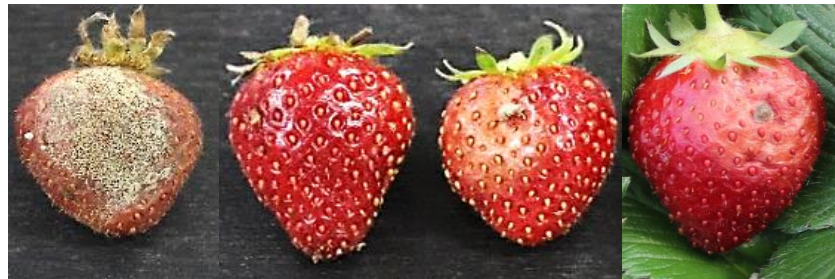

**Naked-CHS3b-1+2**

**Fig. S7.** Minicells-encapsulated dsRNAs (ME-dsRNAs) for sustained protection against *Botryotinia fuckeliana* (1<sup>st</sup> trial). Plants were sprayed on day 0 with minicells, ME-CHS3b1+2 or naked-CHS3b1+2 (targeting *B. fuckeliana* *Chs3b* gene) and inoculated with *B. fuckeliana* on sprayed fruits at 7 days post treatment. Gray mold disease severity was observed at 5 days post inoculation (dpi).

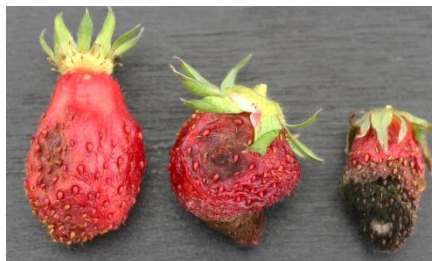

**Minicells**

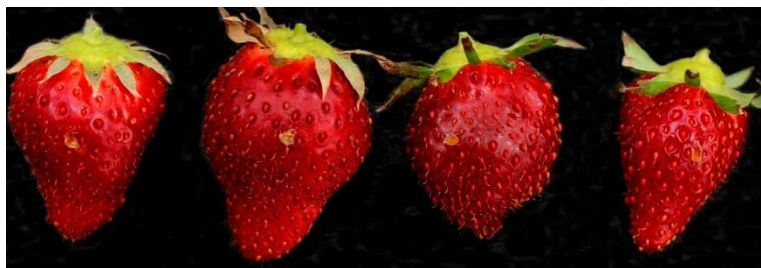

**ME-DCL1+2**

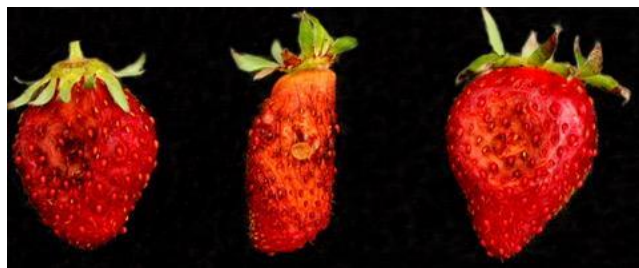

**Naked-DCL1+2**

**Fig. S8.** Minicells-encapsulated dsRNAs (ME-dsRNAs) for sustained protection against *Botryotinia fuckeliana* (2<sup>nd</sup> trial). Plants were sprayed on day 0 with minicells, ME-DCL1+2 or naked-DCL1+2 (targeting *B. fuckeliana* *DCL1* and *DCL2* genes) and inoculated with *B. fuckeliana* on sprayed fruits at 7 days post treatment. Gray mold disease severity was observed at 5 days post inoculation (dpi).
